# Supplementary material for: Gut Microbiota Metabolism of Bile Acids Could Contribute to the Bariatric Surgery Improvements in Extreme Obesity
Source: MDPI journal article supplement (doi:10.3390/metabo11110733), 2021-10-27

**Supplementary Table S1.** List of the pathways.

| BioCyc Pathway ID                | Pathway                                                               |
|----------------------------------|-----------------------------------------------------------------------|
| <b>ARG+POLYAMINE-SYN</b>         | superpathway of arginine and polyamine biosynthesis                   |
| <b>POLYAMINSYN3-PWY</b>          | superpathway of polyamine biosynthesis II                             |
| <b>POLYAMSYN-PWY</b>             | superpathway of polyamine biosynthesis I                              |
| <b>P101-PWY</b>                  | ectoine biosynthesis                                                  |
| <b>BRANCHED-CHAIN-AA-SYN-PWY</b> | superpathway of branched chain amino acid biosynthesis                |
| <b>SER-GLYSYN-PWY</b>            | superpathway of L-serine and glycine biosynthesis I                   |
| <b>PWY0-1061</b>                 | superpathway of L-alanine biosynthesis                                |
| <b>HSERMETANA-PWY</b>            | L-methionine biosynthesis III                                         |
| <b>PWY-6629</b>                  | superpathway of L-tryptophan biosynthesis                             |
| <b>CALVIN-PWY</b>                | Calvin-Benson-Bassham cycle                                           |
| <b>GLUCONEO-PWY</b>              | gluconeogenesis I                                                     |
| <b>PWY0-1241</b>                 | ADP-L-glycero-&beta;                                                  |
| <b>PWY-5659</b>                  | GDP-mannose biosynthesis                                              |
| <b>PEPTIDOGLYCANSYN-PWY</b>      | peptidoglycan biosynthesis I (meso-diaminopimelate containing)        |
| <b>PWY-6385</b>                  | peptidoglycan biosynthesis III (mycobacteria)                         |
| <b>PWY-6386</b>                  | UDP-N-acetylmuramoyl-pentapeptide biosynthesis II (lysine-containing) |
| <b>PWY-6387</b>                  | UDP-N-acetylmuramoyl-pentapeptide biosynthesis I                      |
| <b>PWY0-1338</b>                 | polymyxin resistance                                                  |
| <b>KDO-NAGLIPASYN-PWY</b>        | superpathway of (Kdo) <sub>2</sub> -lipid A biosynthesis              |
| <b>PYRIDNUCSAL-PWY</b>           | NAD salvage pathway I (PNC VI cycle)                                  |
| <b>PWY-5862</b>                  | superpathway of demethylmenaquinol-9 biosynthesis                     |
| <b>PWY-5850</b>                  | superpathway of menaquinol-6 biosynthesis                             |
| <b>PWY-5896</b>                  | superpathway of menaquinol-10 biosynthesis                            |
| <b>PWY-5855</b>                  | ubiquinol-7 biosynthesis (early decarboxylation)                      |
| <b>PWY-5856</b>                  | ubiquinol-9 biosynthesis (early decarboxylation)                      |
| <b>PWY-5857</b>                  | ubiquinol-10 biosynthesis (early decarboxylation)                     |
| <b>PWY-6708</b>                  | ubiquinol-8 biosynthesis (early decarboxylation)                      |
| <b>UBISYN-PWY</b>                | superpathway of ubiquinol-8 biosynthesis (early decarboxylation)      |
| <b>LPSSYN-PWY</b>                | superpathway of lipopolysaccharide biosynthesis                       |
| <b>PWY-7094</b>                  | fatty acid salvage                                                    |
| <b>PPGPPMET-PWY</b>              | ppGpp metabolism                                                      |
| <b>PWY-6277</b>                  | superpathway of 5-aminoimidazole ribonucleotide biosynthesis          |
| <b>PWY-6121</b>                  | 5-aminoimidazole ribonucleotide biosynthesis I                        |
| <b>PWY-6122</b>                  | 5-aminoimidazole ribonucleotide biosynthesis II                       |

|                           |                                                                      |
|---------------------------|----------------------------------------------------------------------|
| <b>PWY-7222</b>           | guanosine deoxyribonucleotides de novo biosynthesis II               |
| <b>PWY-7221</b>           | guanosine ribonucleotides de novo biosynthesis                       |
| <b>PWY-7208</b>           | superpathway of pyrimidine nucleobases salvage                       |
| <b>PWY-5121</b>           | superpathway of geranylgeranyl diphosphate biosynthesis II (via MEP) |
| <b>PWY-7398</b>           | coumarins biosynthesis (engineered)                                  |
| <b>ENTBACSYN-PWY</b>      | enterobactin biosynthesis                                            |
| <b>PWY-7560</b>           | methylerythritol phosphate pathway II                                |
| <b>PWY-5188</b>           | tetrapyrrole biosynthesis I (from glutamate)                         |
| <b>PWY-5189</b>           | tetrapyrrole biosynthesis II (from glycine)                          |
| <b>AST-PWY</b>            | L-arginine degradation II (AST pathway)                              |
| <b>TYRFUMCAT-PWY</b>      | L-tyrosine degradation I                                             |
| <b>VALDEG-PWY</b>         | L-valine degradation I                                               |
| <b>CODH-PWY</b>           | reductive acetyl coenzyme A pathway I (homoacetogenic bacteria)      |
| <b>P23-PWY</b>            | reductive TCA cycle I                                                |
| <b>GLUCOSE1PMETAB-PWY</b> | glucose and glucose-1-phosphate degradation                          |
| <b>PWY-621</b>            | sucrose degradation III (sucrose invertase)                          |
| <b>PWY-5747</b>           | 2-methylcitrate cycle II                                             |
| <b>PWY0-42</b>            | 2-methylcitrate cycle I                                              |
| <b>SULFATE-CYS-PWY</b>    | superpathway of sulfate assimilation and cysteine biosynthesis       |
| <b>SO4ASSIM-PWY</b>       | assimilatory sulfate reduction I                                     |
| <b>GLYCOCAT-PWY</b>       | glycogen degradation I                                               |
| <b>PWY-7446</b>           | sulfoquinovose degradation I                                         |
| <b>ANAGLYCOLYSIS-PWY</b>  | glycolysis III (from glucose)                                        |
| <b>GLYCOLYSIS</b>         | glycolysis I (from glucose 6-phosphate)                              |
| <b>PWY-5484</b>           | glycolysis II (from fructose 6-phosphate)                            |
| <b>NONOXIPENT-PWY</b>     | pentose phosphate pathway (non-oxidative branch) I                   |
| <b>ECASYN-PWY</b>         | enterobacterial common antigen biosynthesis                          |
| <b>TRNA-CHARGING-PWY</b>  | tRNA charging                                                        |
| <b>PWY0-781</b>           | aspartate superpathway                                               |

**Supplementary Figure S1.** Gut microbiota diversity measurements. a) Beta diversity: Unweighted and Weighted Unifrac distances. b) Alpha diversity indexes. It is presented the values at final point (histograms) and changes in values between final and baseline time-points (box and whiskers plots). RYGB is shown in blue; SG is shown in orange.

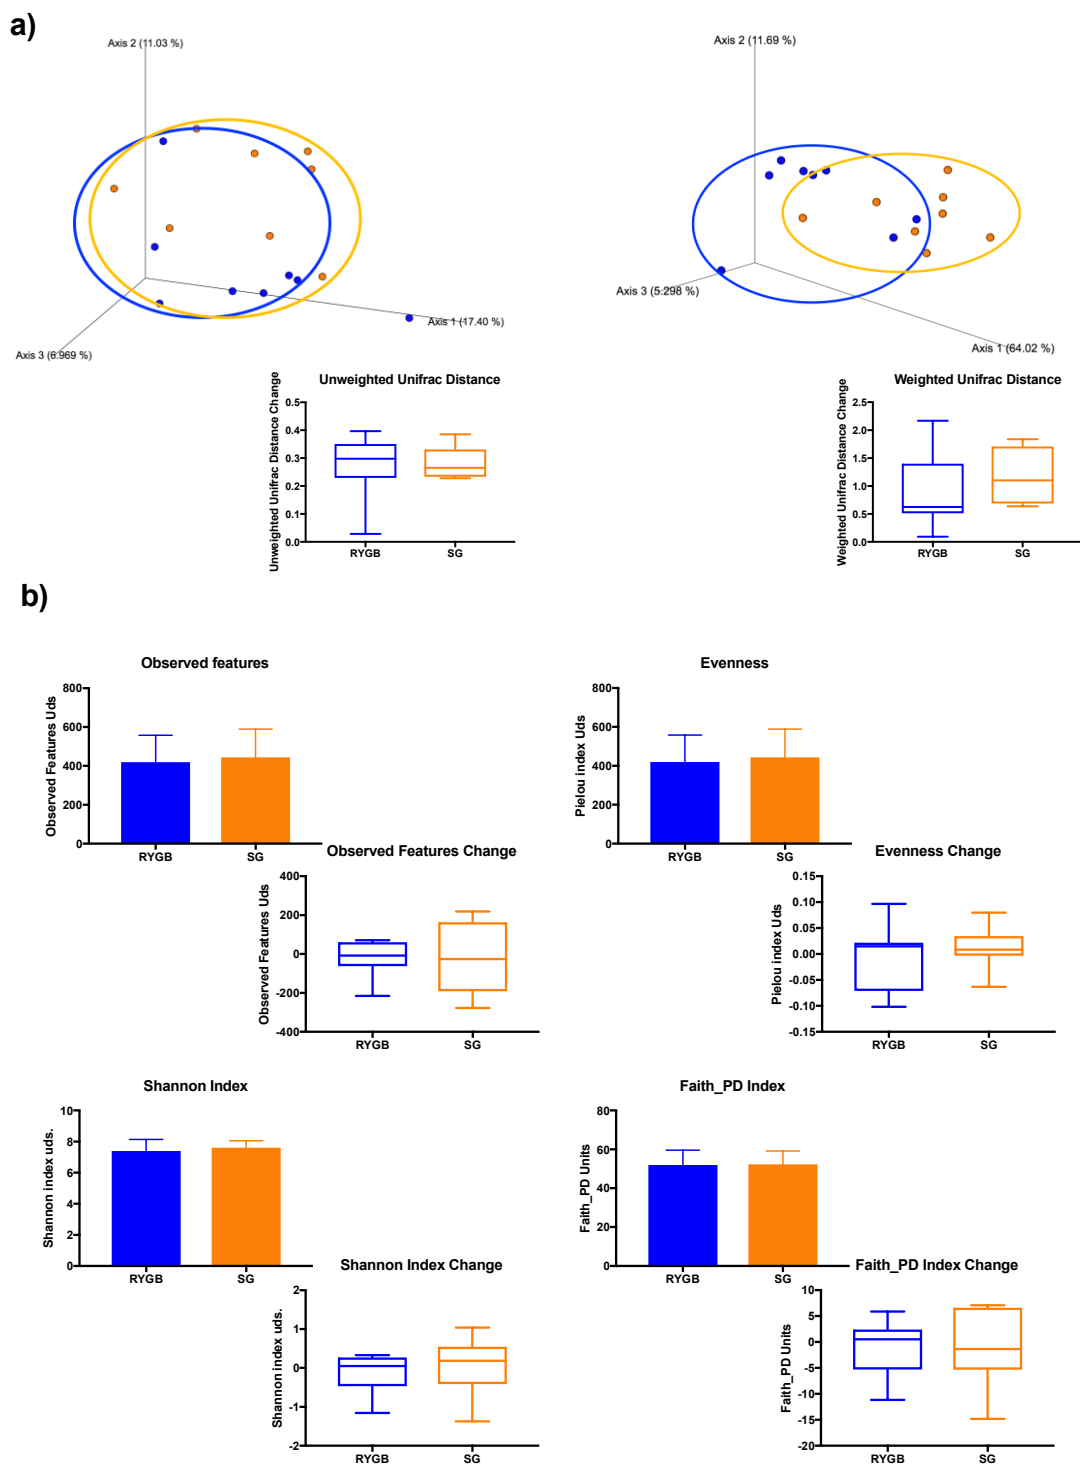

**Supplementary Figure S2.** Bar graphs of the bile acids fold changes in the two bariatric surgery procedures studies that resulted statistically significant between procedures ( $P<0.05$ ) or at least with a statistical tendency ( $P<0.10$ ).

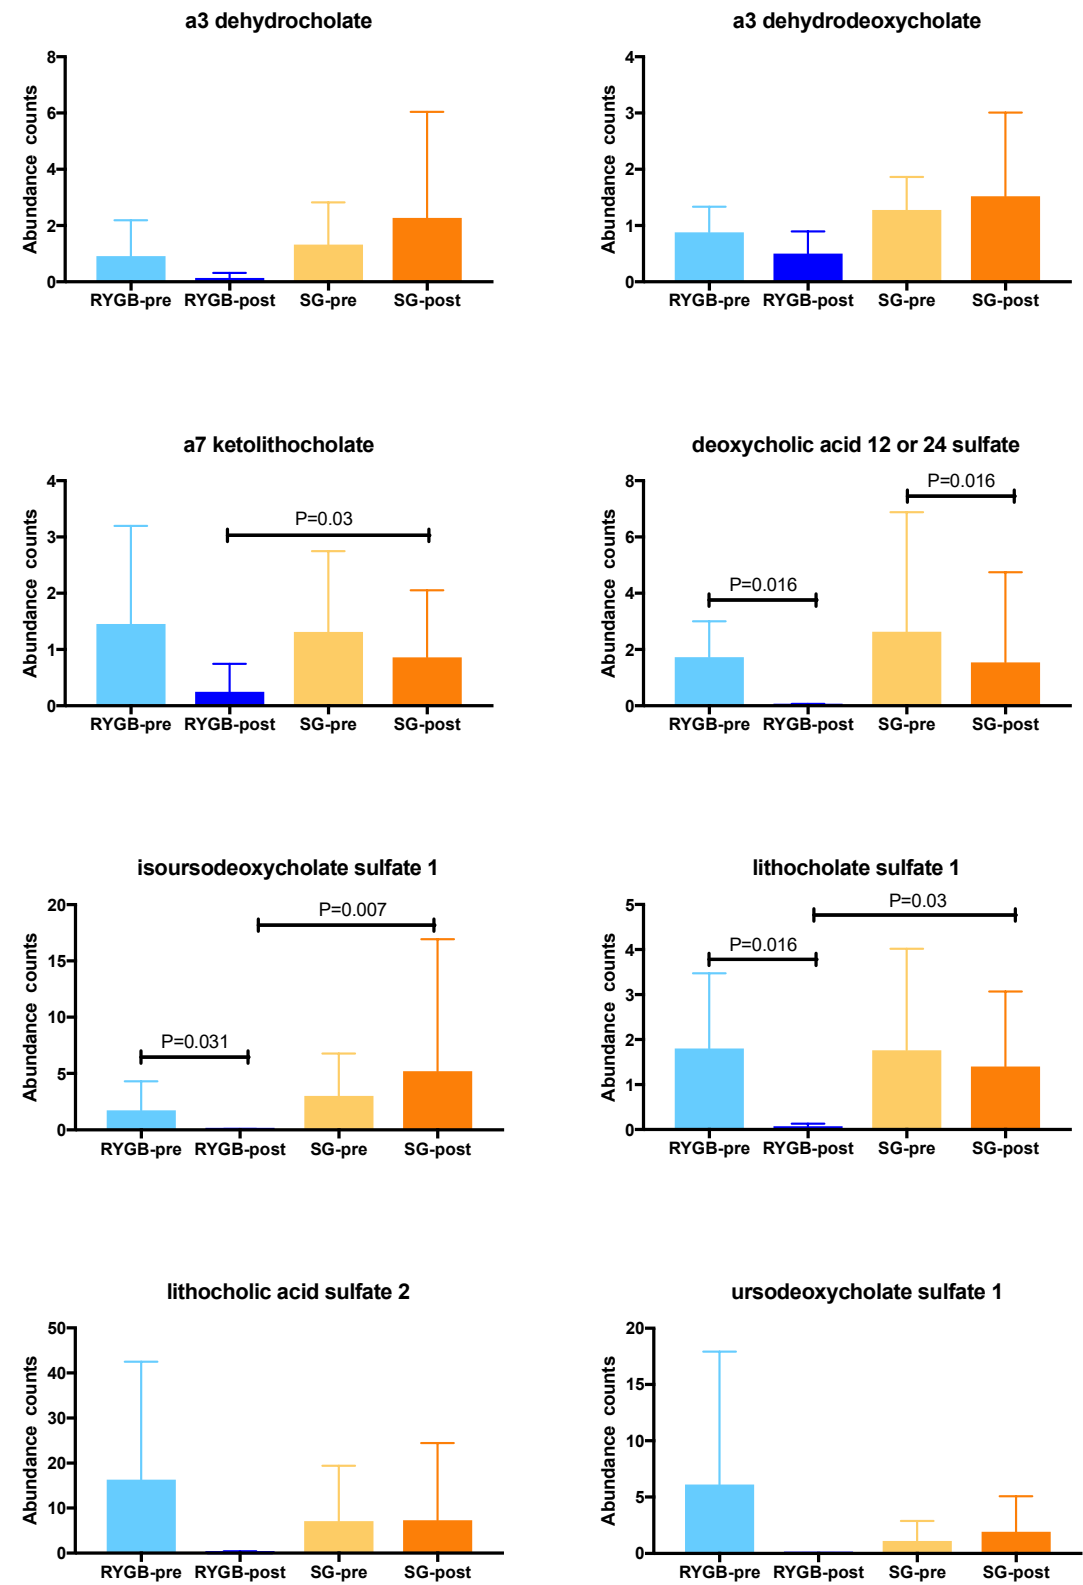

**Supplementary Figure S3.** Scatterplots of Spearman correlations between changes in bacteria relative abundance and fold change (FC) of the secondary bile acids statistically significant ( $P < 0.05$ ).

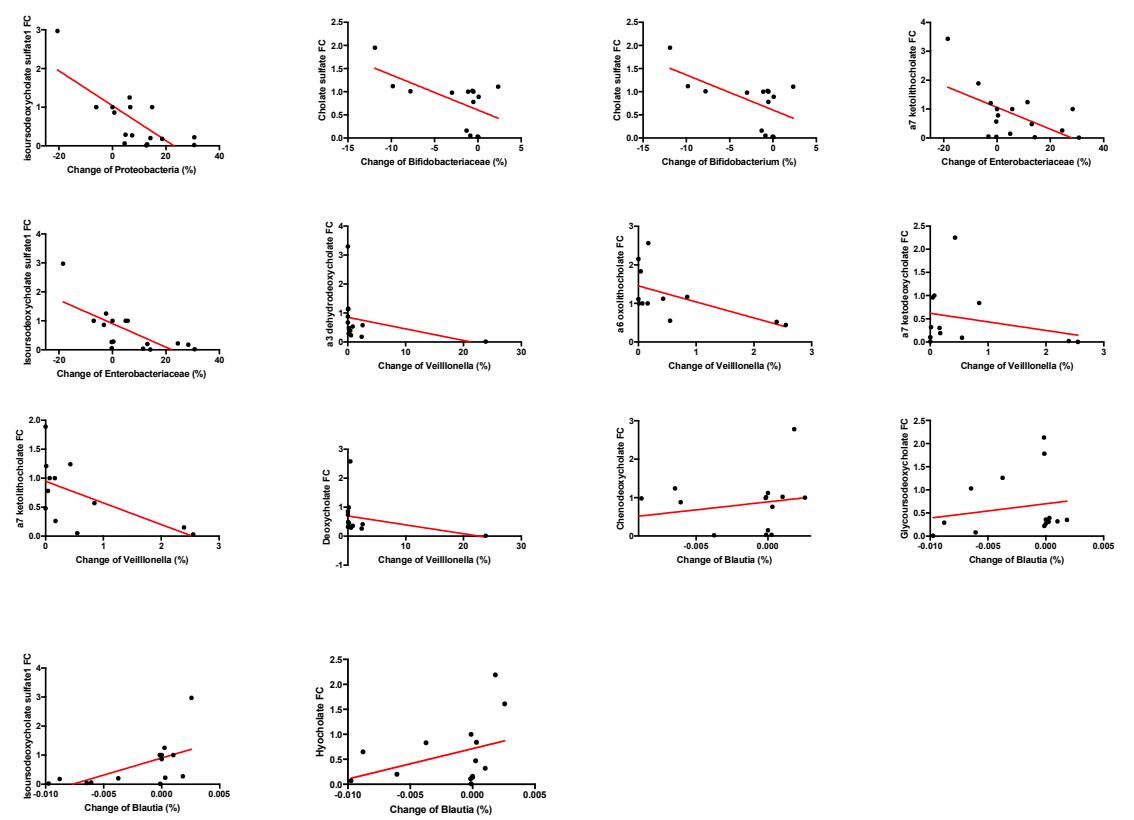

**Supplementary Figure S4.** Scatterplots of the Spearman correlations between changes in anthropometric and biochemical variables with the fold-changes (FC) in secondary bile acids statistically significant ( $P < 0.05$ ).

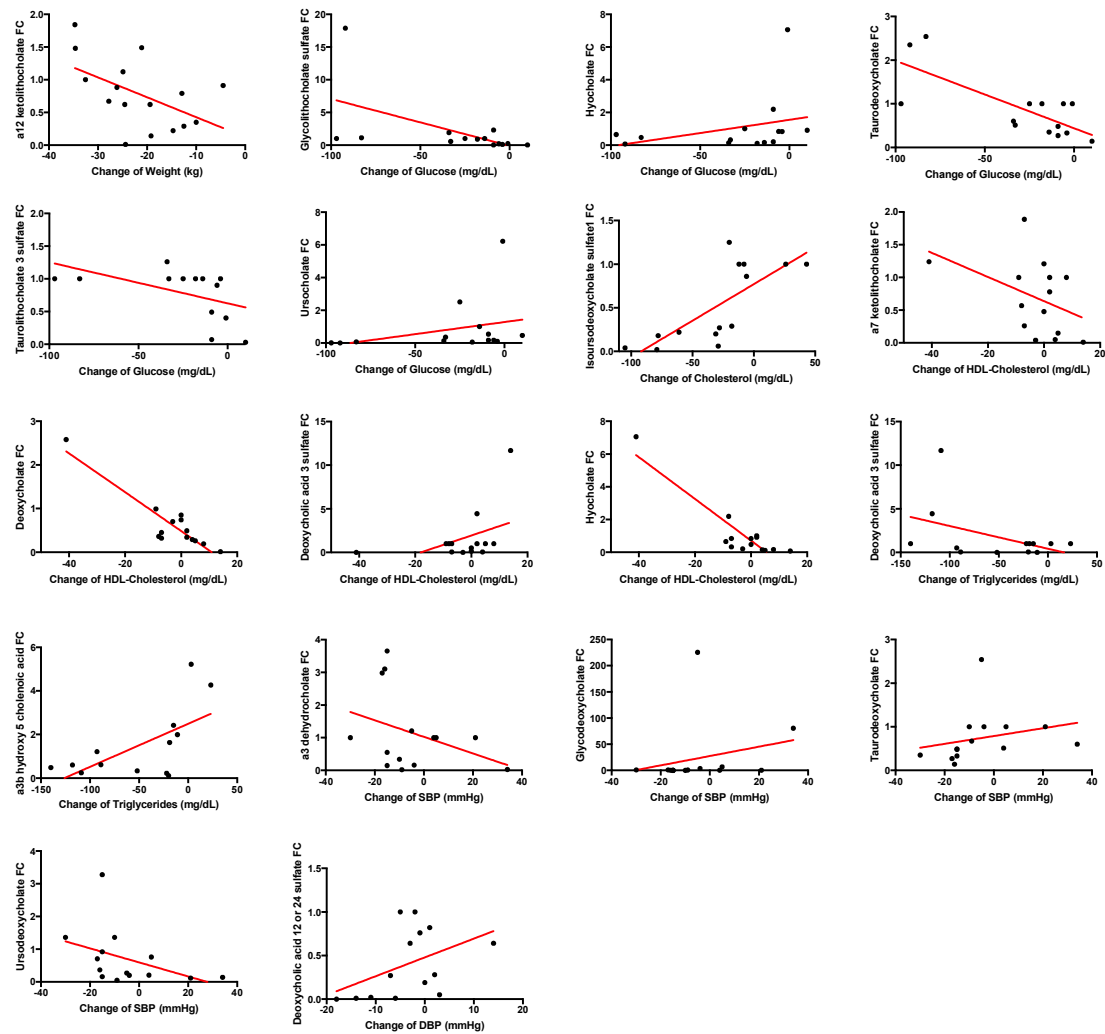

Supplement: s1 [file s1]
